# Supplementary material for: Animal Welfare Assessment Protocols for Bulls in Artificial Insemination Centers: Requirements, Principles, and Criteria
Source: MDPI journal article supplement (doi:10.3390/ani13050942), 2023-03-05
Supplement: s1 [file s1]

Supplementary Table S1. Principles and criteria that are the basis for the Welfare Quality® assessment protocols

| <b>Welfare principles</b> | <b>Welfare criteria</b>                                                                                                        |
|---------------------------|--------------------------------------------------------------------------------------------------------------------------------|
| Good feeding              | Absence of prolonged hunger<br>Absence of prolonged thirst                                                                     |
| Good housing              | Comfort around resting<br>Thermal comfort<br>Ease of movement                                                                  |
| Good health               | Absence of injuries<br>Absence of disease<br>Absence of pain induced by management procedures                                  |
| Appropriate behavior      | Expressing of social behaviors<br>Expressing of other behaviors<br>Good human-animal relationship<br>Positive emotional status |

Supplementary Table S2. Five Freedoms and Five-Domain Model

| <b>Five Freedoms</b>                      | <b>Five Domains</b> |
|-------------------------------------------|---------------------|
| 1. Freedom from hunger and thirst         | 1. Nutrition        |
| 2. Freedom from discomfort                | 2. Environment      |
| 3. Freedom from pain, injury and diseases | 3. Health           |
| 4. Freedom to express normal behavior     | 4. Behavior         |
| 5. Freedom from fear and distress         | 5. Mental state     |
